# Supplementary material
Source: PubMed Central journal article supplement (PMC3849159)
Supplement: rna-10-1117-s01.pdf [file rna-10-1117-s01.pdf]

## **Supplemental Material to:**

**Mohamed Hafez, Gertraud Burger,  
Sergey V. Chteinberg, Franz B. Lang**

**A second eukaryotic group with  
mitochondrion-encoded tmRNA: In silico  
identification and experimental confirmation**

**2012; 10(8)**

**<http://dx.doi.org/10.4161/rna.25376>**

**[www.landesbioscience.com/journals/rnabiology/article/25376/](http://www.landesbioscience.com/journals/rnabiology/article/25376/)**

## SUPPLEMENTAL DATA

Supplement to the manuscript :

### A second eukaryotic group with mitochondrion-encoded tmRNA: *In silico* identification and experimental confirmation

*Mohamed Hafez, Gertraud Burger, Sergey V. Steinberg and B. Franz Lang*

#### AUTHORS' CONTRIBUTIONS

BFL conceived the study, developed the mt-tmRNA covariance model, identified corresponding genes in complete oomycete mtDNAs, and evaluated RNA-Seq data for mapping of the *P. sojae* RNA termini. MH identified additional tmRNA genes in GenBank, wrote the first manuscript draft, and designed figures. SVS established RNA tertiary models. All authors participated in the discussion of results, and production of the final manuscript version.

#### SUPPLEMENTAL TABLES

**Table S1.** Search results with a covariance mt-tmRNA model (based on jakobid sequences) in nine complete oomycete mitochondrial genome sequences. Note a high statistic support despite the short length of the gene sequence, which is due to conservation of both primary sequence and RNA structure. *S. ferax* has the shortest sequence and the most derived features, with no apparent sequence conservation in the T-loop, and a reduced-size T-loop and D-loop.

| Species name                  | E-value  | Start..Stop  | Strand | Structure/Sequence                                                                               |
|-------------------------------|----------|--------------|--------|--------------------------------------------------------------------------------------------------|
| <i>Phytophthora sojae</i>     | 8. 6e-12 | 4170..4246   | +      | UAAAUG GAC CCAA GGCAGUA UUUGG UAUUUCC A auaaaau.aaauuaa GGGAAUA AAAUA. . . GAAUUGA CAUUUA        |
| <i>Phytophthora ipomoeae</i>  | 9. 9e-12 | 4176..4248   | +      | UAAAUG GAC CCAA GGCAGUA UUUGG UAUUUCC A uuaaa. . . . . uuaaua GGGAAUA AUAAAA. . . GAAUUGA CAUUUA |
| <i>Phytophthora andina</i>    | 9. 9e-12 | 4176..4248   | +      | UAAAUG GAC CCAA GGCAGUA UUUGG UAUUUCC A uuaaa. . . . . uuaaua GGGAAUA AUAAAA. . . GAAUUGA CAUUUA |
| <i>Phytophthora infestans</i> | 9. 9e-12 | 4176..4248   | +      | UAAAUG GAC CCAA GGCAGUA UUUGG UAUUUCC A uuaaa. . . . . uuaaua GGGAAUA AUAAAA. . . GAAUUGA CAUUUA |
| <i>Phytophthora mirabilis</i> | 9. 9e-12 | 4174..4246   | +      | UAAAUG GAC CCAA GGCAGUA UUUGG UAUUUCC A uuaaa. . . . . uuaaua GGGAAUA AUAAAA. . . GAAUUGA CAUUUA |
| <i>Phytophthora phaseoli</i>  | 9. 9e-12 | 4176..4248   | +      | UAAAUG GAC CCAA GGCAGUA UUUGG UAUUUCC A uuaaa. . . . . uuaaua GGGAAUA AUAAAA. . . GAAUUGA CAUUUA |
| <i>Phytophthora ramorum</i>   | 7e-11    | 4120..4197   | +      | UAAAUG AAC CCAA GGCAGUA UUUGG UAUUUCC A uuaaa. . . . . uuaaua GGGAAUA AUAAAA. . . GAAUUGA CAUUUA |
| <i>Pythium ultimum</i>        | 8. 6e-11 | 20036..20115 | +      | GAAAUG GAC CCAA GGCAGUA UUUGG UAUUUCC A uuaaa. . . . . uuaaua GGGAAUA AUAAAA. . . GAAUUGA CAUUUA |
| <i>Pythium ultimum</i>        | 8. 6e-11 | 42365..42286 | -      | GAAAUG GAC CCAA GGCAGUA UUUGG UAUUUCC A uuaaa. . . . . uuaaua GGGAAUA AUAAAA. . . GAAUUGA CAUUUA |
| <i>Saprolegnia ferax</i>      | 2e-08    | 11556..11498 | -      | AUAAUG UAC CCAA UU-AAAA AUUGG UAUUUCC A aa. . . . . aa GGGAAUA AAU- . . . -AUUCGA CAUUUA         |
| <i>Saprolegnia ferax</i>      | 2e-08    | 37491..37549 | +      | AUAAUG UAC CCAA UU-AAAA AUUGG UAUUUCC A aa. . . . . aa GGGAAUA AAU- . . . -AUUCGA CAUUUA         |

**Table S2.** Complete list of currently known mt-tmRNAs in jakobids and oomycetes. Sequences identified by covariance search in complete mtDNAs are marked gray.

| Species                                 | GenBank accession number | Note                           |
|-----------------------------------------|--------------------------|--------------------------------|
| <i>Andalucia godoyi</i>                 | KC353352                 | complete mitochondrial genome  |
| <i>Histiona aroides</i>                 | KC353353                 | complete mitochondrial genome  |
| <i>Jakoba libera</i>                    | KC353355                 | complete mitochondrial genome  |
| <i>Reclinomonas americana ATCC50633</i> | KC353356                 | complete mitochondrial genome  |
| <i>R. americana ATCC 50283</i>          | KC353357                 | complete mitochondrial genome  |
| <i>R. americana ATCC 50284</i>          | KC353358                 | complete mitochondrial genome  |
| <i>R. americana ATCC 50394</i>          | NC_001823                | complete mitochondrial genome  |
| <i>Seculamonas ecuadoriensis</i>        | KC353359                 | complete mitochondrial genome  |
| <i>Albugo candida</i>                   | CAIV01000124             | whole genome shotgun sequence  |
| <i>A. laibachii</i>                     | FR825415                 | Illumina short reads           |
| <i>Bremia lactucae</i>                  | JP948723                 | Transcriptome Shotgun Assembly |
| <i>Phytophthora alni</i>                | DQ162893                 | Partial sequence               |
| <i>P. andina</i>                        | NC_015619                | complete mitochondrial genome  |
| <i>P. cactorum</i>                      | DQ162892                 | Partial sequence               |
| <i>P. cambivora</i>                     | DQ162894                 | Partial sequence               |
| <i>P. capsici</i>                       | DQ162899                 | Partial sequence               |
| <i>P. cinnamomi</i>                     | JF746382                 | Partial sequence               |
| <i>P. citricola</i>                     | DQ162900                 | Partial sequence               |
| <i>P. citrophthora</i>                  | DQ162901                 | Partial sequence               |
| <i>P. cryptogea</i>                     | DQ162908                 | Partial sequence               |
| <i>P. drechsleri</i>                    | DQ162910                 | Partial sequence               |
| <i>P. erythroseptica</i>                | DQ162909                 | Partial sequence               |
| <i>P. europaea</i>                      | DQ162895                 | Partial sequence               |
| <i>P. fragariae</i>                     | DQ162896                 | Partial sequence               |
| <i>P. infestans</i>                     | NC_002387                | complete mitochondrial genome  |
| <i>P. inundata</i>                      | DQ162902                 | Partial sequence               |
| <i>P. ipomoeae</i>                      | NC_015622                | complete mitochondrial genome  |
| <i>P. katsurae</i>                      | DQ162904                 | Partial sequence               |
| <i>P. kernoviae</i>                     | DQ162914                 | Partial sequence               |
| <i>P. lateralis</i>                     | DQ162912                 | Partial sequence               |
| <i>P. medicaginis</i>                   | DQ162911                 | Partial sequence               |
| <i>P. mirabilis</i>                     | NC_015606                | complete mitochondrial genome  |
| <i>P. nicotianae</i>                    | JF706917                 | Partial sequence               |
| <i>P. palmivora</i>                     | DQ162906                 | Partial sequence               |
| <i>P. phaseoli</i>                      | NC_015616                | complete mitochondrial genome  |
| <i>P. pseudosyringae</i>                | DQ162907                 | Partial sequence               |
| <i>P. quercina</i>                      | DQ162905                 | Partial sequence               |
| <i>P. ramorum</i>                       | NC_009384                | complete mitochondrial genome  |
| <i>P. sojae</i>                         | NC_009385                | complete mitochondrial genome  |
| <i>Pseudoperonospora cubensis</i>       | AHJF01014480             | whole genome shotgun sequence  |
| <i>Pythium ultimum</i>                  | NC_014280                | complete mitochondrial genome  |
| <i>Saprolegnia ferax</i>                | NC_005984                | complete mitochondrial genome  |

**Figure S1. Standard tRNA secondary structure**

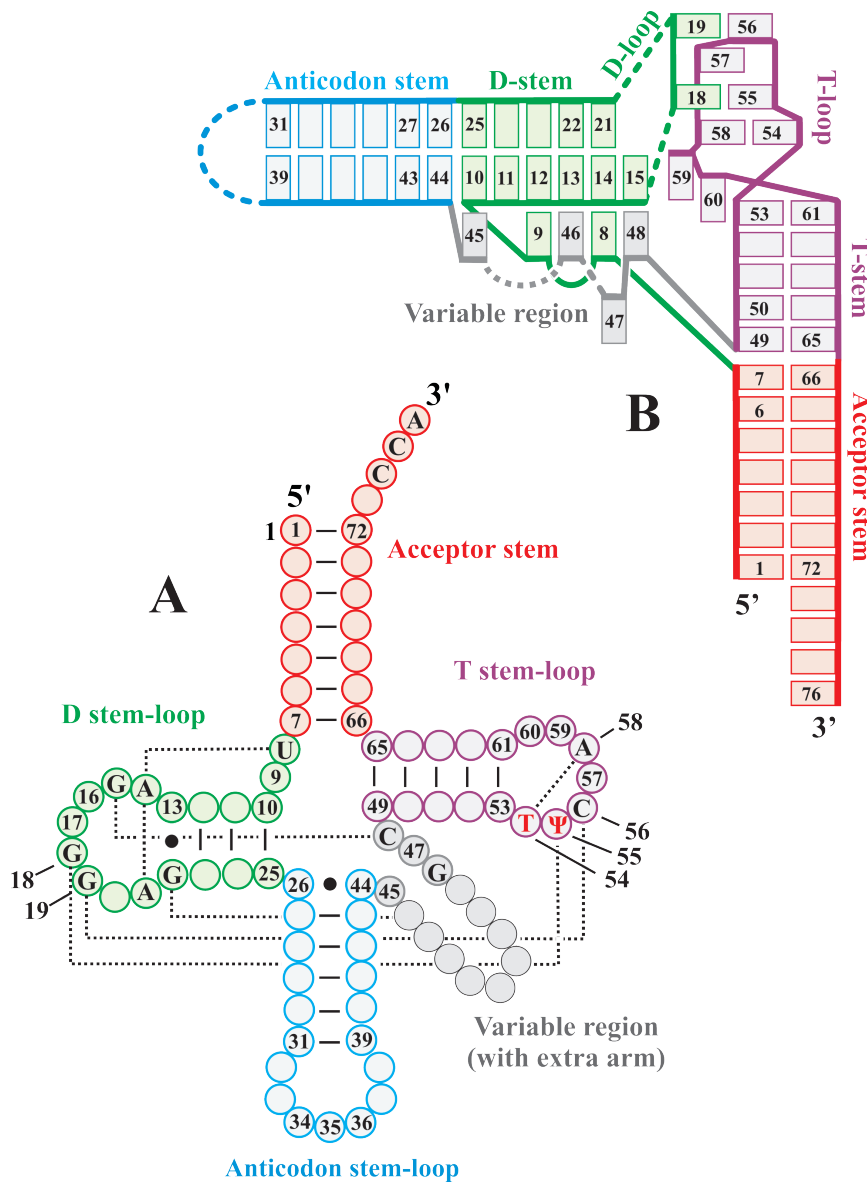

Figure adapted from (Lang et al. 2011). **A, cloverleaf.** Each stem-loop is shown in a different color. Short lines connect nucleotides forming Watson-Crick base pairs within stems. Black filled circles (base pairs 13-22 and 26-44) indicate that many tRNAs have non-Watson-Crick interactions. Dotted lines connect nucleotides involved in conserved tertiary interactions. Nucleotides are numbered in accordance with the standard tRNA nomenclature, based on the yeast Phe-tRNA (Rich and RajBhandary 1976). Note that numerous cytosolic tRNAs do not fit this structure. For instance, nucleotide 47 does not exist in some tRNAs, and position 17 may be either empty or additional nucleotides may be inserted between positions 17 and 18. Further, some tRNAs have one or two additional nucleotides between positions 20 and 21. Finally, the variable region located between the anticodon and T stem-loop, which minimally contains three nucleotides, may be extended by eight or more nucleotides and form an extra arm.

**B, L-form.** Rectangles represent individual nucleotides. Nucleotides of stem-loops are shown in the same color and with the same numbering as in A. Nucleotides of the anticodon loop and non-stacked nucleotides of the D-loop (16, 17 and 20) are not shown (indicated by dashed lines). The dashed gray line connecting nucleotides 46 and 47 of the variable region indicate that additional non-numbered nucleotides may be inserted and form the extra arm.

Tertiary interactions U8-A14 and 15-48 are found in the D-stem-loop region of all cytosolic tRNAs. The presence of a Watson-Crick or U-G base pair 13-22 and of the tertiary contacts 9-23 and 22-46 constitutes the standard pattern of tertiary interactions. This pattern may also be accompanied by the tertiary contact 10-45. In the DT-region, there are two inter-loop base pairs G18-Ψ55 and G19-C56 separated by a purine-57. The dinucleotide 59-60 bulges between base pairs 53-61 and 54-58. Nucleotide 59 stacks to the tertiary base pair 15-48, which constitutes the last layer of the D/anticodon helical domain. This interaction stabilizes the perpendicular arrangement of the two helical domains of the tRNA L-shape.

Figure S2. Occurrence of mt-tmRNAs across eukaryotes

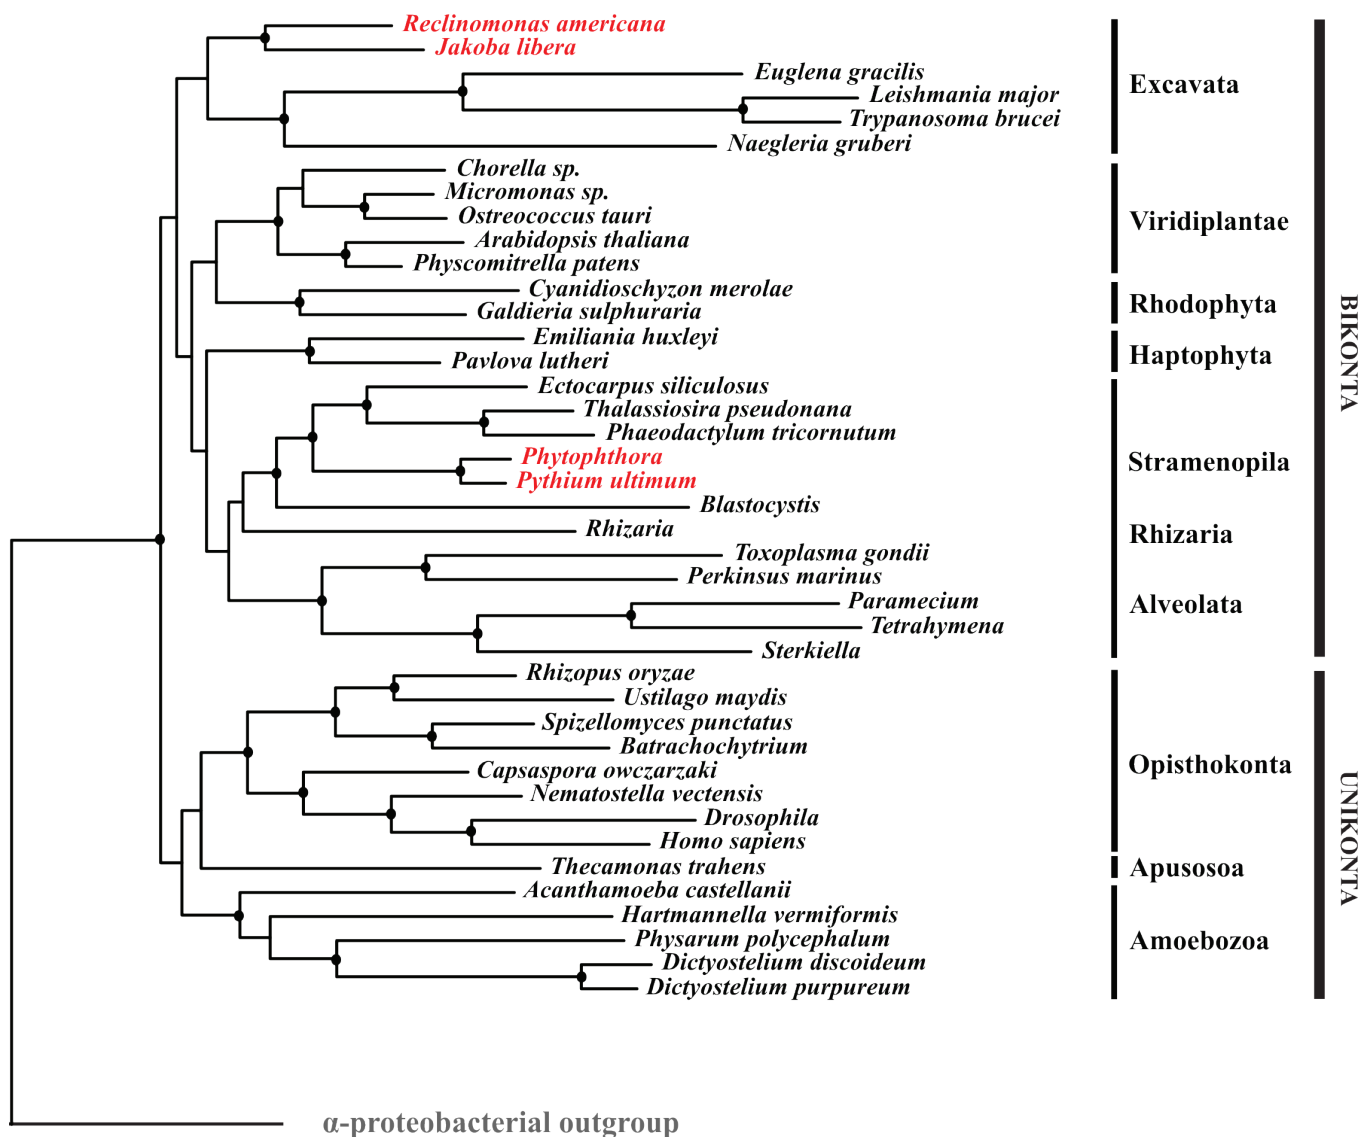

The tree (adapted from (Derelle and Lang 2011)) has been inferred with mtDNA- plus nucleus-encoded mitochondrial proteins, and is rooted with  $\alpha$ -Proteobacteria (from which mitochondria derive). Species representatives that have mtDNA-encoded tmRNAs are marked in red. Note that tmRNAs are only identified in sub-lineages of two very distant organismal groups, jakobids (Excavata) and oomycetes (Stramenopila).
